# Supplementary figures and images for: Inter-Row Reflective Film Mulching Revealed the Regulation of Ground-Reflected Light on Grape Flavoromics
Source: MDPI journal article supplement (doi:10.3390/foods15050930), 2026-03-06

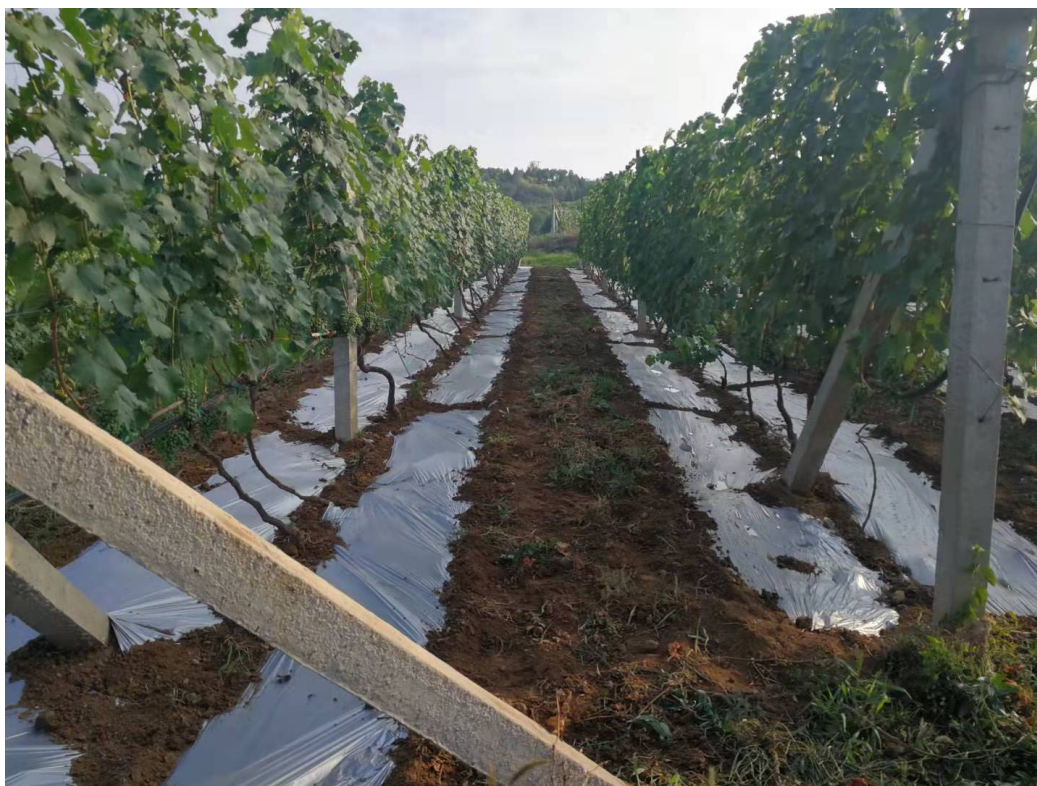

**Supplementary Figure 1.** The photography of the vineyard with the reflecting film treatment.

Supplement: s1 [file Supplementary Figure.pdf › Supplementary Figure.pdf]
